# Supplementary material
Source: HighWire-hosted journal article supplement (https://fn.bmj.com/content/102/3/F235)

eFigure 1. Study population flow diagram

**eFigure 1**

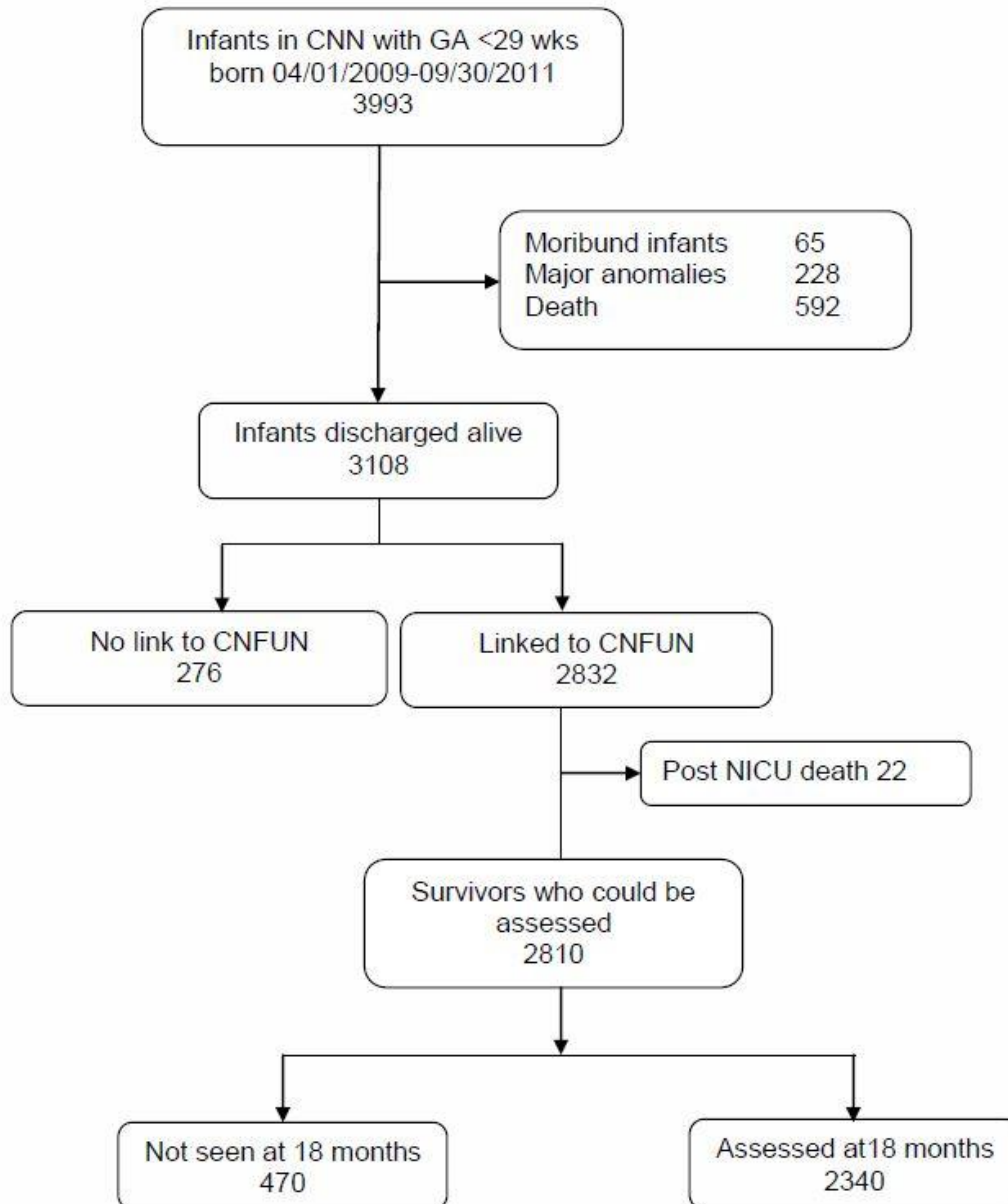

Supplement: inline-supplementary-material-1 [file inline-supplementary-material-1.pdf]
